# Supplementary material for: A single female-specific piRNA is the primary determiner of sex in the silkworm
Source: Springer Nature journal article supplement (doi:10.1038/nature13315), 2014-05-13
Supplement: 41586_2014_BFnature13315_MOESM78_ESM.pdf [file 41586_2014_BFnature13315_MOESM78_ESM.pdf]

Supplementary Table 1. Oligonucleotides used in this study.

| Primer name  | Primer sequence (5'-3')                       | purpose      |
|--------------|-----------------------------------------------|--------------|
| Bmdsx-F      | AACCATGCCACCACTGATACCAAC                      | PCR          |
| Bmdsx-R      | GCACAACGAATACTGCTGCAATCG                      | PCR          |
| Fem-1F       | TCAAAAACGTATGTATCAGG                          | PCR          |
| Fem-1R       | AAACCAATATTCTTCTAGAC                          | PCR          |
| Fem-2R       | CTCGGATCGCACGAAATCAG                          | PCR          |
| Fem-F        | ACCGCTTGGATCAGAAAGTG                          | qPCR         |
| Fem-R        | GGCTTCGACGTTGTTTCATT                          | qPCR         |
| Fem piRNA    | TACCTCTTTTTGTCAATTCATAAAGTCAT                 | piRNA-qPCR   |
| let-7        | TGAGGTAGTAGGTTGTATAGTA                        | piRNA-qPCR   |
| Masc piRNA   | AAAAGAGGTAACAATTGAAGCTAATCAGA                 | piRNA-qPCR   |
| Masc-F       | GCTAAAATTGCTGGGATTGCTA                        | qPCR         |
| Masc-R       | CAGCAATCGGAATTTTCTTCTG                        | qPCR         |
| Siwi-F       | AGATGGGTTCTGTTGTTCACTCA                       | qPCR         |
| Siwi-R       | CATATCGCAACGACTAATTGTAC                       | qPCR         |
| BmAgo3-F     | CGTCCAGAAGCTGTAACATC                          | qPCR         |
| BmAgo3-R     | AAGAGATATCCTCCGAGTGT                          | qPCR         |
| 2nd-F        | AGGGATACATCAGTAGCGGAGT                        | genotyping   |
| 2nd-R        | AACACATCAACCATTGGAACAG                        | genotyping   |
| Musashi-A1   | CCTGGGCCTATATATGTAAATCGAT                     | genotyping   |
| Musashi-B1   | CCTGGGCCTAGCACACTATGGAGAG                     | genotyping   |
| Sasuke-1A    | CTGGCAGGAGAAGAAGAAGCGAT                       | genotyping   |
| Sasuke-2B    | GAGCCAACACTTCTGAAGCTGA                        | genotyping   |
| Bonsai-1B    | CAAAGGGACTTCGACGTCGTTCCGGAC                   | genotyping   |
| Bonsai-2B    | TAAACAATGTATCTATCATCGAGCT                     | genotyping   |
| Siwi-cont-F  | CAATCTACGCATTCAAGATC                          | genome qPCR  |
| Siwi-cont-R  | CATCAGCTTGAAATTAGCTC                          | genome qPCR  |
| rp49-F       | CCCAACATTGGTTACGGTTC                          | qPCR         |
| rp49-R       | GCTCTTTCCACGATCAGCTT                          | qPCR         |
| Masc_hind_FI | TTAAGCTTATGGATTACAAGGATGACGACGATAAGACATCGGCAA | Flag-Masc    |
| ag_F         | AAGTAGCAAC                                    | construction |

| Masc_bam_       |                                   | Flag-Masc     |
|-----------------|-----------------------------------|---------------|
| R               | AAGGATCCCTATTGAAACGGCGGTGGTG      | construction  |
| masc            |                                   |               |
| resistant1      | GcCAgAAgGAaGTcACAATTGAAGCTAATCAGA | mutagenesis   |
| masc            |                                   |               |
| resistant2      | TgACtTCcTTcTGgCGATTcACAAAGCCATTTA | mutagenesis   |
| GeneRacer       |                                   |               |
| 5' primer       |                                   |               |
| (primer a in    |                                   | Modified RACE |
| EDFig. 9)       | CGACTGGAGCACGAGGACACTGA           | (BmN4)        |
| GeneRacer       |                                   |               |
| 5' nested       |                                   |               |
| primer          |                                   |               |
| (primer b in    |                                   | Modified RACE |
| EDFig. 9)       | GGACACTGACATGGACTGAAGGAGTA        | (BmN4)        |
| Primer c in     |                                   | Control in    |
| EDFig. 9        | CAGCTATCGGGAGTATCGTCTG            | Modified RACE |
| Primer d in     |                                   | Modified RACE |
| EDFig. 9        | TATCTGCAGAATTCCACCACAC            | (BmN4)        |
| Primer e in     |                                   | Modified RACE |
| EDFig. 9        | GTAGAATCGAGACCGAGGAGAG            | (BmN4)        |
| Primer for      |                                   | Modified RACE |
| <i>Masc</i>     | GAAAACTACCGTGTcACCCTTG            | (embryo)      |
| Nested primer   |                                   | Modified RACE |
| for <i>Masc</i> | GGAGCTGTAGCAATCCTGGTC             | (embryo)      |
| siRNA name      | siRNA sequence (5'-3')            | purpose       |
| siGFP gui-1     | AUAGACGUUGUGGCUGUUGUA             | RNAi          |
| siGFP pas-1     | CAACAGCCACAACGUCUAUUU             | RNAi          |
| siSiwi gui-1    | UAAGAUUCGCAUACGUUCGUU             | RNAi          |
| siSiwi pas-1    | CGAACGUAUGCGAAUCUUAUU             | RNAi          |
| siSiwi gui-2    | UUGAACGAAGAUUCGGGUGUU             | RNAi          |

|                     |                                                                                       |                 |
|---------------------|---------------------------------------------------------------------------------------|-----------------|
| siSiwi pas-2        | CACCCGAAUCUUCGUUCAAUU                                                                 | RNAi            |
| siBmAgo3            |                                                                                       |                 |
| gui-1               | UUUGCUUUGGUCAUAUGGGUU                                                                 | RNAi            |
| siBmAgo3            |                                                                                       |                 |
| pas-1               | CCCAUAUGACCAAAGCAAAGU                                                                 | RNAi            |
| siBmAgo3            |                                                                                       |                 |
| gui-2               | UACAGACGACGUUAUGCACUU                                                                 | RNAi            |
| siBmAgo3            |                                                                                       |                 |
| pas-2               | GUGCAUAACGUCGUCUGUACA                                                                 | RNAi            |
| siMasc gui-1        | UUGAAAAUCGCGGCAAACUU                                                                  | RNAi            |
| siMasc pas-1        | GUUUUGCCGCGAUUUUCAAUU                                                                 | RNAi            |
| siMasc gui-2        | UUUUUGCUGUAGGUGAAUCUU                                                                 | RNAi            |
| siMasc pas-2        | GAUUCACCUACAGCAAAAUU                                                                  | RNAi            |
| piRNA               |                                                                                       |                 |
| inhibitor name      | siRNA sequence (5'-3')                                                                | purpose         |
| Fem piRNA inhibitor | CGUAAAUGACUUUAUGAAUUGACAAAAGAGGU ACAAU<br>(2'-O-Me)                                   | piRNA inhibitor |
| GFP piRNA inhibitor | AUGCCACCUACGGCAAGCUGACCCUGAAGUUCA UCUGC<br>(2'-O-Me)                                  | piRNA inhibitor |
| oligo probe         |                                                                                       |                 |
| name                | oligonucleotide sequence (5'-3')                                                      | purpose         |
| Fem sense           | CTCTTTTTGTCAATTCATAAAGTCATTCAGTGTAGTCGAATTCTTG<br>CAATGTTGCGTTTGCTTATTTGATGTGCAATTTAG | Northern        |
| Fem antisense       | CTAAATTGCACATCAAATAAGCAAACGCAACATTGCAAGAATTCGA<br>CTACACTGAATGACTTTATGAATTGACAAAAGAG  | Northern        |
